# Supplementary material for: Thermally induced charge transfer in a quinoid-bridged linear Cu3compound
Source: Royal Society of Chemistry journal article supplement (doi:10.1039/d2dt01980a), 2022-01-01
Supplement: d2dt01980a1.pdf [file d2dt01980a1.pdf]

## Electronic Supplementary Information

### Thermal Induced Charge Transfer in Quinoid-bridged Linear Cu<sub>3</sub> Compound

Xiao-Lin Liu, Xiao-Yi Zhang, Hai-Xia Zhao\*, La-Sheng Long\* and Lan-Sun Zheng

Collaborative Innovation Center of Chemistry for Energy Materials, State Key Laboratory of Physical Chemistry of Solid Surfaces and Department of Chemistry College of Chemistry and Chemical Engineering, Xiamen University, Xiamen 361005, P. R. China

E-mail: hxzhao@xmu.edu.cn; lslong@xmu.edu.cn

**Crystal structure determination.** X-ray single-crystal diffraction data were collected at different temperatures by using an Agilent Supernova CCD diffractometer in a  $\omega$ -scan mode, with  $\Delta\omega = 1.0^\circ$ . The single-crystal diffraction data at 100 K and 300 K were collected by using Cu-K $\alpha$  radiation ( $\lambda = 1.5418 \text{ \AA}$ ). Data collection and processing were accomplished with the CrysAlis PRO program. Absorption corrections were applied by using the multi-scan program. The structures were solved and refined using full matrix least-squares based on  $F^2$  with the SHELXS-2013/SHELXL-2013 programs within OLEX 2. The crystal data, as well as the details of data collection and refinement for the complexes, are summarized in **Table S1**. The supplementary crystallographic data for this paper are accessible at CCDC 2143793 (100 K), 2143806 (300 K). These data can be obtained free of charge from the Cambridge Crystallographic Data Centre.

**Measurement of electrical properties.** The temperature-dependent dielectric constants ( $\epsilon^* = \epsilon' - i\epsilon''$ ) were measured by two-probe *a.c.* impedance analysis in the frequency range of  $10^{3.0} \text{ Hz}$  to  $10^{4.5} \text{ Hz}$  (Wayne Kerr 6500B Precise Impedance Analyzer). The electric contacts were prepared by using silver paste (DAD-87) to attach  $50 \text{ }\mu\text{m}$  gold wires to the pressed pellets of the pure samples. The pellets were placed into a Janis cryogenic refrigeration system equipped with an American Cryomagnetics 9 T Superconducting Magnet.

**Spectral acquisition.** Electron paramagnetic resonance (EPR) spectra were acquired with an X-band Bruker A 300 spectrometer operating at approximately 9.4 GHz; X-ray photoelectron spectroscopy (XPS) data were acquired in an UHV

chamber equipped with an Omicron XPS (base pressure  $2 \times 10^{-10}$  mBar) instrument with a monochromatic aluminum anode X-ray source that supplied  $K\alpha$  radiation (1486.6 eV); Infrared spectra (IR) were recorded on a Nicolet AVATAR FT-IR 360 spectrophotometer with pressed KBr pellets; Ultraviolet–visible–near infrared spectroscopy measurements were performed with a UV-Vis-NIR spectrophotometer (Cary 5000) at room temperature.

**Measurement of other properties.** The magnetic susceptibility of the samples was measured with a Quantum Design MPMS superconducting quantum interference device (SQUID). A powder sample of **1** was analyzed under a *dc* field of 5000 Oe; Powder X-ray diffraction (PXRD) patterns were recorded on a Rigaku Ultima IV diffractometer with Cu- $K\alpha$  radiation ( $\lambda = 1.5418$  Å) with a graphite monochromator, from 5° to 50°, at a scanning rate of 5° min<sup>-1</sup>; C, H, and N microanalyses were carried out with a CE instruments EA 1110 elemental analyzer.

#### **Computational Details:**

All DFT calculations were performed in the theoretical level of UB3LYP/6-31++G(d,p)//SDD by using Gaussian 09,<sup>1</sup> where the initial antiferromagnetic spin population were derived from the magnetic susceptibility measurement. Concerning the effect of temperature, the initial configuration was directly obtained from X-ray single-crystal diffraction results at 300 K without further optimization.

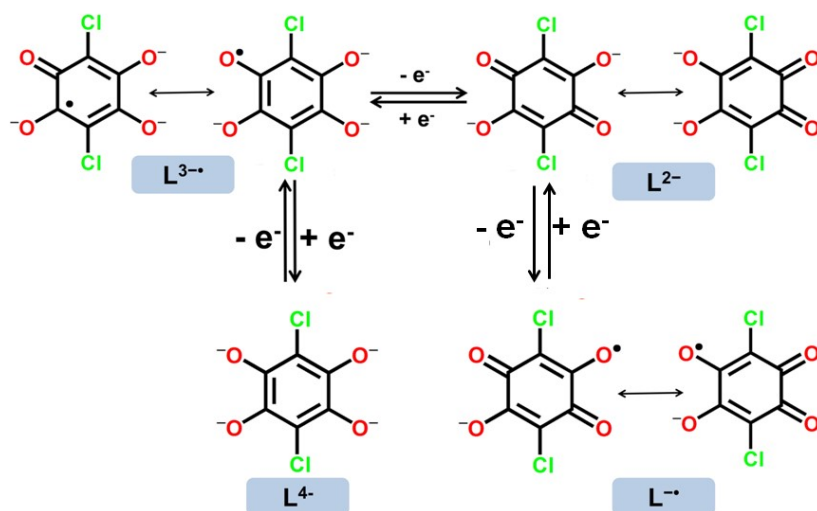

**Scheme 1.** Redox Series of Chloranilic Acid.  $L^{3-\bullet\bullet}$  and  $L^{\bullet\bullet}$  are the paramagnetic radical bridging ligand.

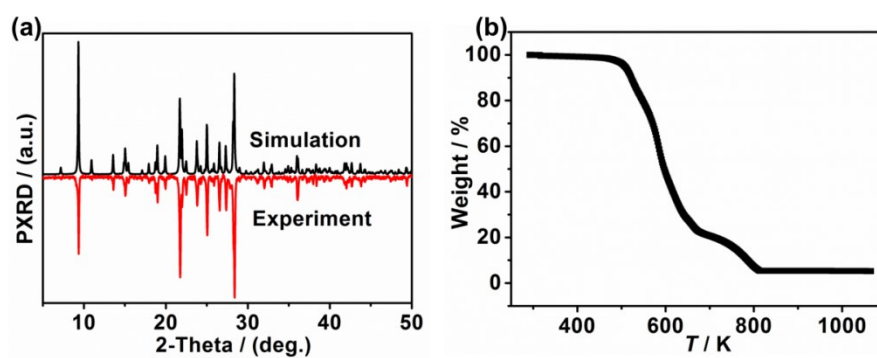

**Fig. S1.** (a) PXRD patterns at room temperature and (b) TG curve of **1**.

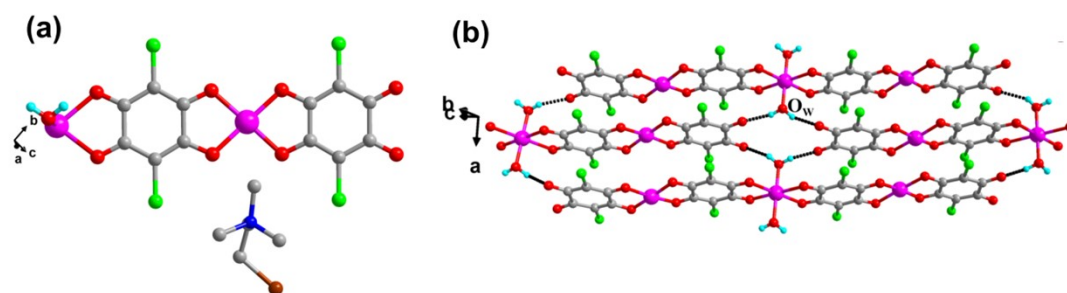

**Fig. S2.** The asymmetric unit of **1** at 100 K. (b) Layer structure of  $[\text{Cu}_3(\text{L})_4(\text{H}_2\text{O})_2]^{2-}$  (dashed lines denote hydrogen bonds).

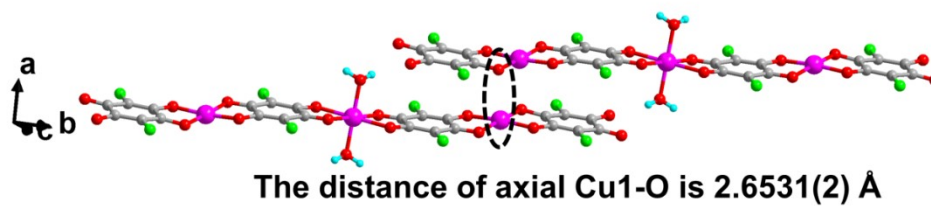

**Fig. S3.** The axial structure of **1**

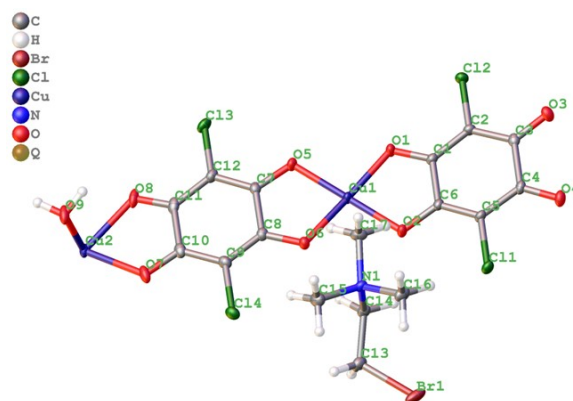

**Fig. S4.** The atomic label of **1**.

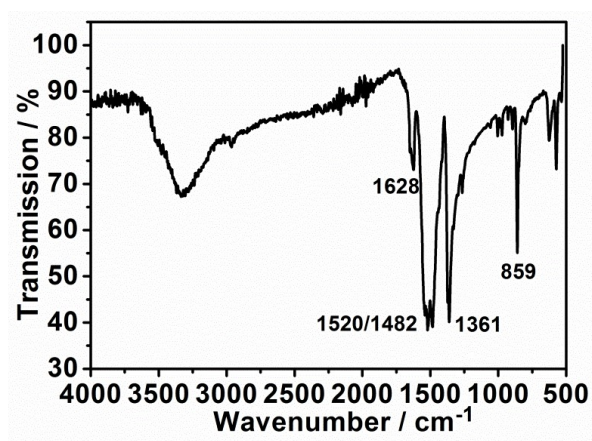

**Fig. S5.** Infrared spectra of **1** at room temperature.

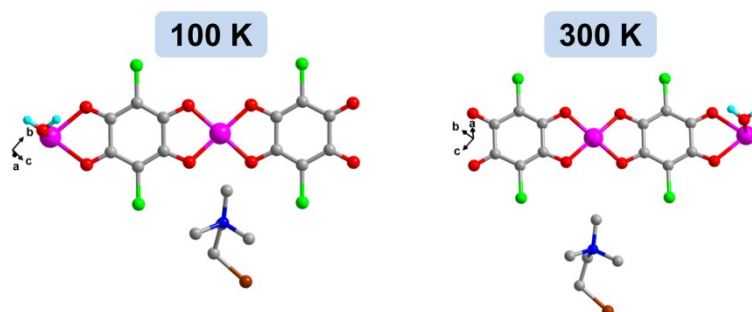

**Fig. S6.** The  $(\text{CH}_3)_3\text{NCH}_2\text{CH}_2\text{Br}^+$  cation remained in ordered in the whole temperature range from 100 K and 300 K.

**Table S1.** Crystallographic data for **1** at different temperatures.

| Compound                                                                                                                    | [(CH <sub>3</sub> ) <sub>3</sub> NCH <sub>2</sub> CH <sub>2</sub> Br] <sub>2</sub> [Cu <sub>3</sub> (Cl <sub>2</sub> An) <sub>4</sub> (H <sub>2</sub> O) <sub>2</sub> ] |                      |
|-----------------------------------------------------------------------------------------------------------------------------|-------------------------------------------------------------------------------------------------------------------------------------------------------------------------|----------------------|
| Temperature (K)                                                                                                             | 100                                                                                                                                                                     | 300                  |
| Formula weight                                                                                                              | 1388.64                                                                                                                                                                 | 1388.64              |
| Crystal system                                                                                                              | triclinic                                                                                                                                                               | triclinic            |
| Space group                                                                                                                 | $P\bar{1}$                                                                                                                                                              | $P\bar{1}$           |
| $a$ (Å)                                                                                                                     | 7.1490(2)                                                                                                                                                               | 7.2675(2)            |
| $b$ (Å)                                                                                                                     | 12.4532(4)                                                                                                                                                              | 12.4908(3)           |
| $c$ (Å)                                                                                                                     | 12.4560(4)                                                                                                                                                              | 12.5292(3)           |
| $\alpha$ (deg.)                                                                                                             | 98.008(2)                                                                                                                                                               | 98.477(2)            |
| $\beta$ (deg.)                                                                                                              | 94.863(2)                                                                                                                                                               | 95.120(2)            |
| $\gamma$ (deg.)                                                                                                             | 95.210(2)                                                                                                                                                               | 95.417(2)            |
| $V$ (Å <sup>3</sup> )                                                                                                       | 1088.23(6)                                                                                                                                                              | 1113.75(5)           |
| $Z$                                                                                                                         | 1                                                                                                                                                                       | 1                    |
| Scan mode                                                                                                                   | $\omega$ -scan                                                                                                                                                          | $\omega$ -scan       |
| $\rho_{cal}$ (g · cm <sup>-3</sup> )                                                                                        | 2.119                                                                                                                                                                   | 2.070                |
| $\mu$ (mm <sup>-1</sup> )                                                                                                   | 9.081                                                                                                                                                                   | 8.873                |
| $F(000)$                                                                                                                    | 685.0                                                                                                                                                                   | 685.0                |
| Crystal size (mm <sup>3</sup> )                                                                                             | 0.05 × 0.01 × 0.05                                                                                                                                                      | 0.05 × 0.01 × 0.05   |
| Radiation                                                                                                                   | Cu K $\alpha$                                                                                                                                                           | Cu K $\alpha$        |
| $2\theta$ range for data collection (deg)                                                                                   | 7.202 - 152.802                                                                                                                                                         | 7.198 - 152.632      |
| index ranges                                                                                                                | $-8 \leq h \leq 7$                                                                                                                                                      | $-9 \leq h \leq 9$   |
|                                                                                                                             | $-15 \leq k \leq 15$                                                                                                                                                    | $-15 \leq k \leq 15$ |
|                                                                                                                             | $-15 \leq l \leq 15$                                                                                                                                                    | $-15 \leq l \leq 15$ |
| Reflections collected                                                                                                       | 14734                                                                                                                                                                   | 10326                |
| $R_{int}$                                                                                                                   | 0.0367                                                                                                                                                                  | 0.0417               |
| Refinement method                                                                                                           | full-matrix least-squares on $F^2$                                                                                                                                      |                      |
| Data / restraints / parameters                                                                                              | 4506/0/308                                                                                                                                                              | 4443 / 0 / 308       |
| Goodness-of-fit on $F^2$                                                                                                    | 1.160                                                                                                                                                                   | 1.068                |
| $R_1, \omega R_2$ [ $I > 2\sigma(I)$ ]                                                                                      | 0.0413, 0.1144                                                                                                                                                          | 0.0608, 0.1735       |
| $R_1, \omega R_2$ [ all data ]                                                                                              | 0.0445, 0.1167                                                                                                                                                          | 0.0644, 0.1795       |
| Largest diff. peak/hole (e · Å <sup>-3</sup> )                                                                              | 1.25/−0.77                                                                                                                                                              | 2.19/−1.20           |
| $R_1 = \sum   F_o  -  F_c   / \sum  F_o , \omega R_2 = \{ \sum [\omega(F_o^2 - F_c^2)^2] / \sum [\omega(F_o^2)^2] \}^{1/2}$ |                                                                                                                                                                         |                      |

**Table S2.** Selected coordination and ligand bond lengths (Å) for **1**.

| Temperature | 100 K    | 300 K    |
|-------------|----------|----------|
| Cu1-O1      | 1.924(2) | 1.929(3) |
| Cu1-O2      | 1.936(2) | 1.921(3) |
| Cu1-O5      | 1.937(2) | 1.936(2) |
| Cu1-O6      | 1.939(2) | 1.931(3) |
| Cu2-O7      | 2.135(3) | 2.126(3) |
| Cu2-O8      | 2.124(3) | 2.127(3) |
| Cu2-O9      | 1.962(3) | 1.977(7) |
| C1-O1       | 1.281(4) | 1.290(4) |
| C6-O2       | 1.293(4) | 1.283(4) |
| C4-O4       | 1.232(4) | 1.230(5) |
| C3-O3       | 1.230(4) | 1.226(5) |
| C8-O6       | 1.277(4) | 1.270(5) |
| C7-O5       | 1.274(4) | 1.274(4) |
| C10-O7      | 1.241(4) | 1.241(5) |
| C11-O8      | 1.245(4) | 1.234(5) |

**Table S3.** Equivalent isotropic displacement parameters (Å<sup>2</sup>) of coordinated water for **1**.

| Temperatur<br>e     | 100 K     | 300 K     |
|---------------------|-----------|-----------|
| O(H <sub>2</sub> O) | 0.0228(5) | 0.0493(8) |

**Table S4.** Equivalent isotropic displacement parameters (Å<sup>2</sup>) of (CH<sub>3</sub>)<sub>3</sub>NCH<sub>2</sub>CH<sub>2</sub>Br<sup>+</sup> cation for **1**.

| Temperature | 100 K      | 300 K      |
|-------------|------------|------------|
| Br1         | 0.0278(13) | 0.0815(3)  |
| N1          | 0.0146(5)  | 0.0339(7)  |
| C13         | 0.0195(7)  | 0.0528(11) |
| C14         | 0.0159(6)  | 0.0380(8)  |
| C15         | 0.0204(7)  | 0.0558(12) |
| C16         | 0.0166(7)  | 0.0535(11) |
| C17         | 0.0136(6)  | 0.0522(11) |

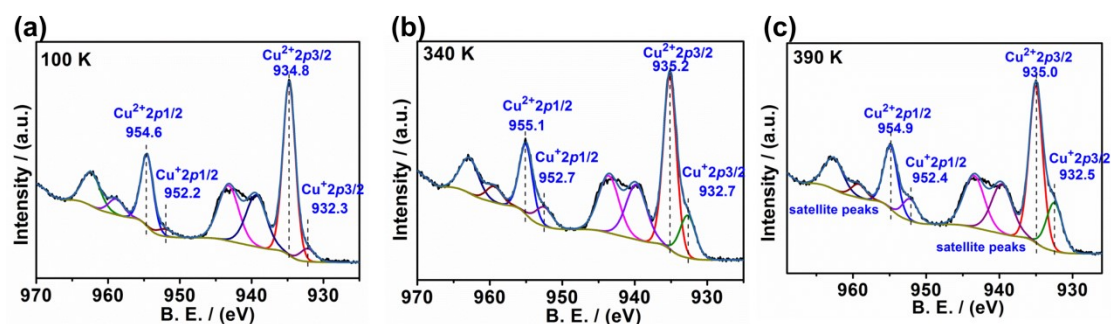

**Fig. S7.** Temperature-dependent XPS survey spectrum of **1** from 100 to 390 K.

**Table S5.** The percentage content of Cu<sup>II</sup> and Cu<sup>I</sup> was obtained by XPS peak area fitting.

|       | Cu <sup>II</sup> (%) | Cu <sup>I</sup> (%) |
|-------|----------------------|---------------------|
| 100 K | 95.6                 | 4.4                 |
| 300 K | 88.3                 | 11.7                |
| 340 K | 85.9                 | 14.1                |
| 390 K | 73.3                 | 26.7                |

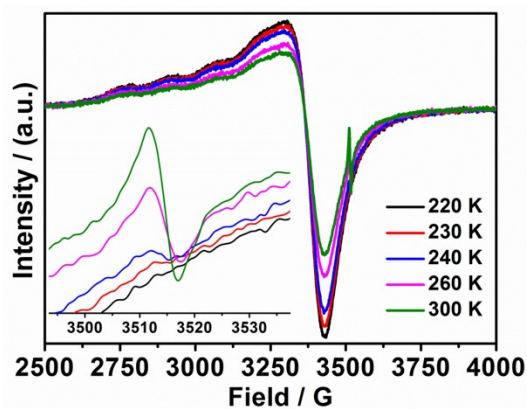

**Fig. S8.** EPR spectra of **1** in the temperature range of 220–300 K.



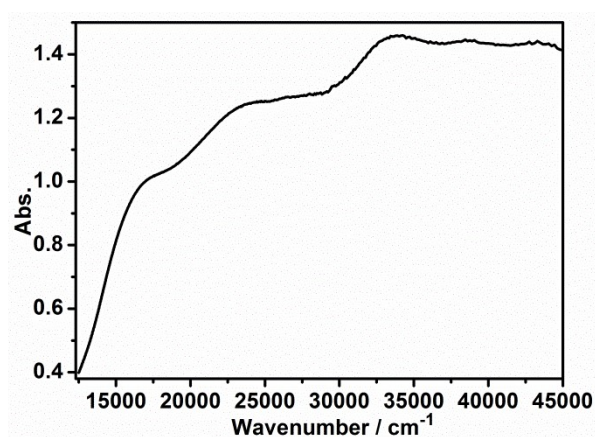

**Fig. S9.** UV-Vis-NIR spectra of **1** at room temperature.

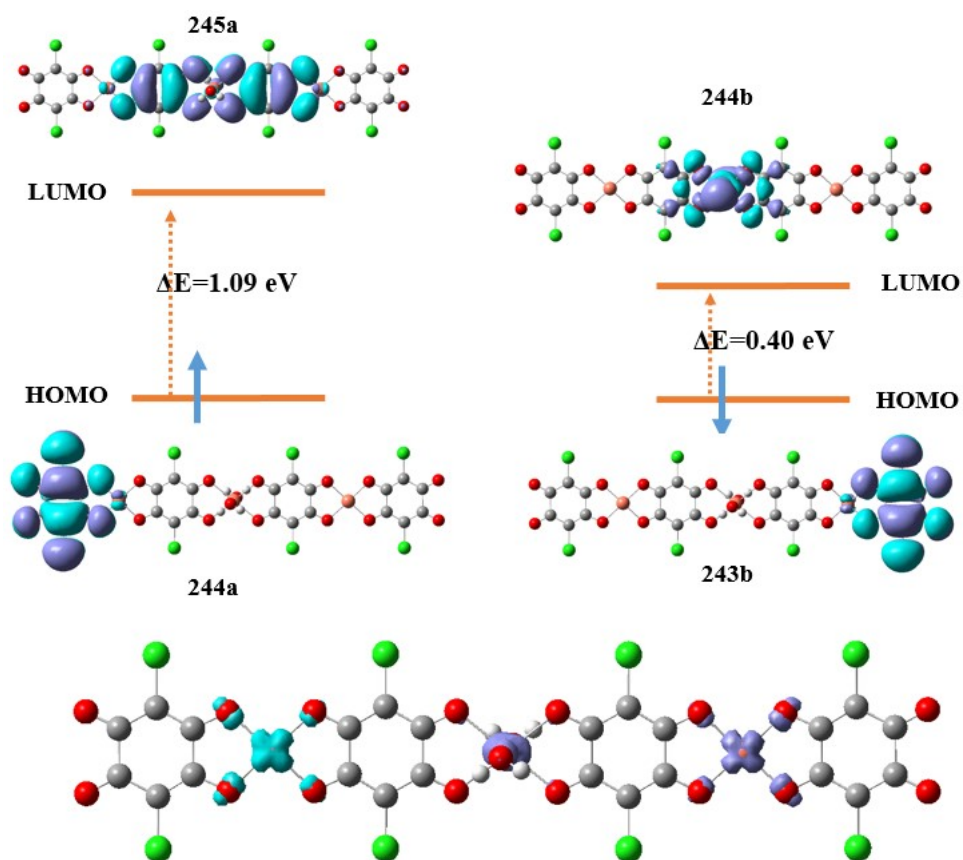

**Fig. 10.** (a) Two possible transitions for thermal charge transfer; (b) spin density of **1** with the 0.01 au isovalue.

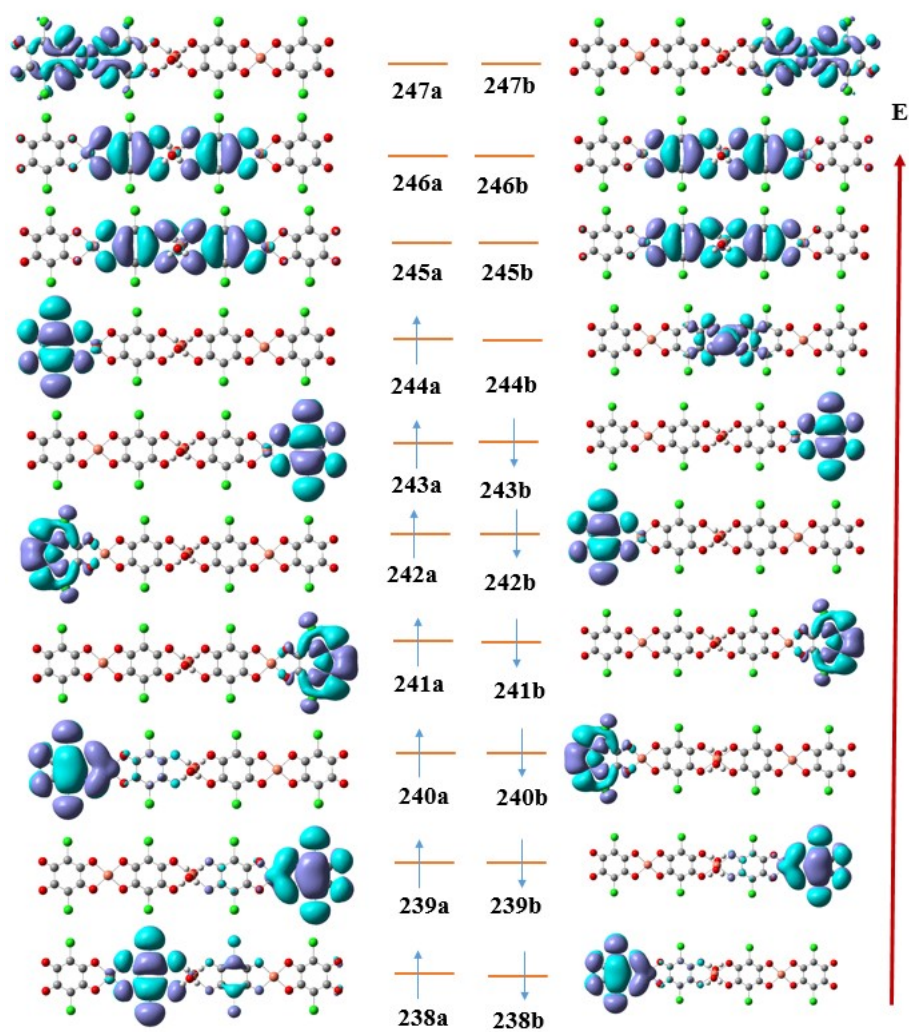

**Fig. S11.** Frontier molecular orbitals of **1** with spin up (labelled as a) and spin down (labelled as b) with the 0.01 au isovalue.

#### References:

1. Gaussian 09, Revision A.1, M. J. Frisch, et al Gaussian, Inc., Wallingford CT, 2009.
